# Supplementary material
Source: publisher figshare collection journal article supplement (https://karger.figshare.com/ndownloader/files/31530191)
Supplement: Supplementary file 1 [file 31530191]

Legends for supplementary figures

Fig. S1. Forest plot of the prevalence of ferritin levels below 30-40 ng/ml among women with non-scarring alopecia

Fig. S2. Forest plot of the prevalence of iron deficiency anemia among women with non-scarring alopecia
